# Supplementary material
Source: publisher figshare collection journal article supplement (https://frontiersin.figshare.com/ndownloader/files/22852073)

# Stroke Outcomes Measure Survey

April 2018 Feedback: Please complete these questions to help us better understand how we use the updated Stroke Outcomes Measure. Our goal of the survey is two-fold--we're interested in 1) the implementation of the updated measure and how it's impacting our workflow and 2) how we can improve the measure itself. Thanks for your time!

## CURRENT USE OF THE STROKE OUTCOMES MEASURE

### 1. How many language assessments do you perform per month?

Mark only one oval.

- ☐ 0
- ☐ 1-2
- ☐ 3-5
- ☐ >5

### 2. I currently use the Stroke Outcomes Measure for all of my language evaluations.

Mark only one oval.

|                   |                       |                       |                       |                       |                       |                |
|-------------------|-----------------------|-----------------------|-----------------------|-----------------------|-----------------------|----------------|
|                   | 1                     | 2                     | 3                     | 4                     | 5                     |                |
| Strongly disagree | <input type="radio"/> | <input type="radio"/> | <input type="radio"/> | <input type="radio"/> | <input type="radio"/> | Strongly agree |

### 3. How confident are you in your ability to complete a language assessment in the rehab setting?

Mark only one oval.

|               |                       |                       |                       |                       |                       |                |
|---------------|-----------------------|-----------------------|-----------------------|-----------------------|-----------------------|----------------|
|               | 1                     | 2                     | 3                     | 4                     | 5                     |                |
| Not confident | <input type="radio"/> | <input type="radio"/> | <input type="radio"/> | <input type="radio"/> | <input type="radio"/> | Very confident |

### 4. Of the 60 minutes you're in the room completing a speech-language-cognitive evaluation, how many minutes are you spending on the standardized Stroke Outcomes Measure?

Mark only one oval.

- ☐ 1-10 minutes
- ☐ 11-20 minutes
- ☐ 21-30 minutes
- ☐ 31-40 minutes
- ☐ 41-50 minutes
- ☐ 51-60 minutes

**5. How long does a typical language assessment report take to write (i.e. time spent documenting in Epic and writing report)?**

*Mark only one oval.*

- ☐ 20-30 minutes
- ☐ 31-40 minutes
- ☐ 41-50 minutes
- ☐ 51-60 minutes
- ☐ 60+ minutes

**6. I feel that my report clearly reflects the data I collected during the evaluation.**

*Mark only one oval.*

|                   |                       |                       |                       |                       |                       |                |
|-------------------|-----------------------|-----------------------|-----------------------|-----------------------|-----------------------|----------------|
|                   | 1                     | 2                     | 3                     | 4                     | 5                     |                |
| Strongly disagree | <input type="radio"/> | <input type="radio"/> | <input type="radio"/> | <input type="radio"/> | <input type="radio"/> | Strongly agree |

**7. I feel that my report paints a clear picture of the patient's current level of function.**

*Mark only one oval.*

|                   |                       |                       |                       |                       |                       |                |
|-------------------|-----------------------|-----------------------|-----------------------|-----------------------|-----------------------|----------------|
|                   | 1                     | 2                     | 3                     | 4                     | 5                     |                |
| Strongly disagree | <input type="radio"/> | <input type="radio"/> | <input type="radio"/> | <input type="radio"/> | <input type="radio"/> | Strongly agree |

**8. I feel that my report can be easily interpreted by future clinicians to assess a patient's progress.**

*Mark only one oval.*

|                   |                       |                       |                       |                       |                       |                |
|-------------------|-----------------------|-----------------------|-----------------------|-----------------------|-----------------------|----------------|
|                   | 1                     | 2                     | 3                     | 4                     | 5                     |                |
| Strongly disagree | <input type="radio"/> | <input type="radio"/> | <input type="radio"/> | <input type="radio"/> | <input type="radio"/> | Strongly agree |

**9. After an evaluation, I am confident diagnosing aphasia subtype (e.g. aphasia as Broca's, Wernicke's, Transcortical Motor, Conduction, etc)**

*Mark only one oval.*

|                   |                       |                       |                       |                       |                       |                |
|-------------------|-----------------------|-----------------------|-----------------------|-----------------------|-----------------------|----------------|
|                   | 1                     | 2                     | 3                     | 4                     | 5                     |                |
| Strongly disagree | <input type="radio"/> | <input type="radio"/> | <input type="radio"/> | <input type="radio"/> | <input type="radio"/> | Strongly agree |

**10. My confidence diagnosing aphasia subtype has improved since adopting the Stroke Outcomes Measure.**

*Mark only one oval.*

|                   |                       |                       |                       |                       |                       |                |
|-------------------|-----------------------|-----------------------|-----------------------|-----------------------|-----------------------|----------------|
|                   | 1                     | 2                     | 3                     | 4                     | 5                     |                |
| Strongly disagree | <input type="radio"/> | <input type="radio"/> | <input type="radio"/> | <input type="radio"/> | <input type="radio"/> | Strongly agree |

## EVALUATING THE MEASURE

**11. I believe that obtaining standardized measures on all stroke patients is important.***Mark only one oval.*

|                   | 1                     | 2                     | 3                     | 4                     | 5                     |                |
|-------------------|-----------------------|-----------------------|-----------------------|-----------------------|-----------------------|----------------|
| Strongly disagree | <input type="radio"/> | <input type="radio"/> | <input type="radio"/> | <input type="radio"/> | <input type="radio"/> | Strongly agree |

**12. I feel that the Stroke Outcomes Measure provides meaningful information towards my characterization of patients***Mark only one oval.*

|                   | 1                     | 2                     | 3                     | 4                     | 5                     |                |
|-------------------|-----------------------|-----------------------|-----------------------|-----------------------|-----------------------|----------------|
| Strongly disagree | <input type="radio"/> | <input type="radio"/> | <input type="radio"/> | <input type="radio"/> | <input type="radio"/> | Strongly agree |

**13. I feel that the Stroke Outcomes Measures is an efficient use of time with my patients.***Mark only one oval.*

|                   | 1                     | 2                     | 3                     | 4                     | 5                     |                |
|-------------------|-----------------------|-----------------------|-----------------------|-----------------------|-----------------------|----------------|
| Strongly disagree | <input type="radio"/> | <input type="radio"/> | <input type="radio"/> | <input type="radio"/> | <input type="radio"/> | Strongly agree |

**14. The Stroke Outcomes Measure contributes to \_\_\_ % of my overall assessment of the patient's language and cognitive abilities (e.g. Does the measure represent 80% of your assessment because you present additional tests or 100% of your assessment?)***Mark only one oval.*

- ☐ 0-15%
- ☐ 16-30%
- ☐ 31-45%
- ☐ 46-60%
- ☐ 61-75%
- ☐ 76-90%
- ☐ 91-100%
- ☐ Other: \_\_\_\_\_

**15. What other assessments/subtests do you typically use in conjunction with the Stroke Outcomes Measure?**

---

---

---

---

---

**16. What's working? Please indicate what you find useful in the measure.**

---

---

---

---

---

**17. What still needs improvement? Please indicate what barriers you encounter and ways the measure could be improved. Are there items that aren't helpful? Are there items you'd like to add?**

---

---

---

---

---

---

Powered by

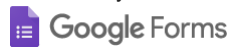

Supplement: Supplementary file [file 22852073]
